# Supplementary material
Source: bioRxiv or medRxiv preprint supplement (https://www.biorxiv.org/highwire/filestream/110500/field_highwire_adjunct_files/3/362277-4.pdf)
Supplement: Supplementary file [file 362277-4.pdf]

# Köttgen *HNF4A* rs11574736

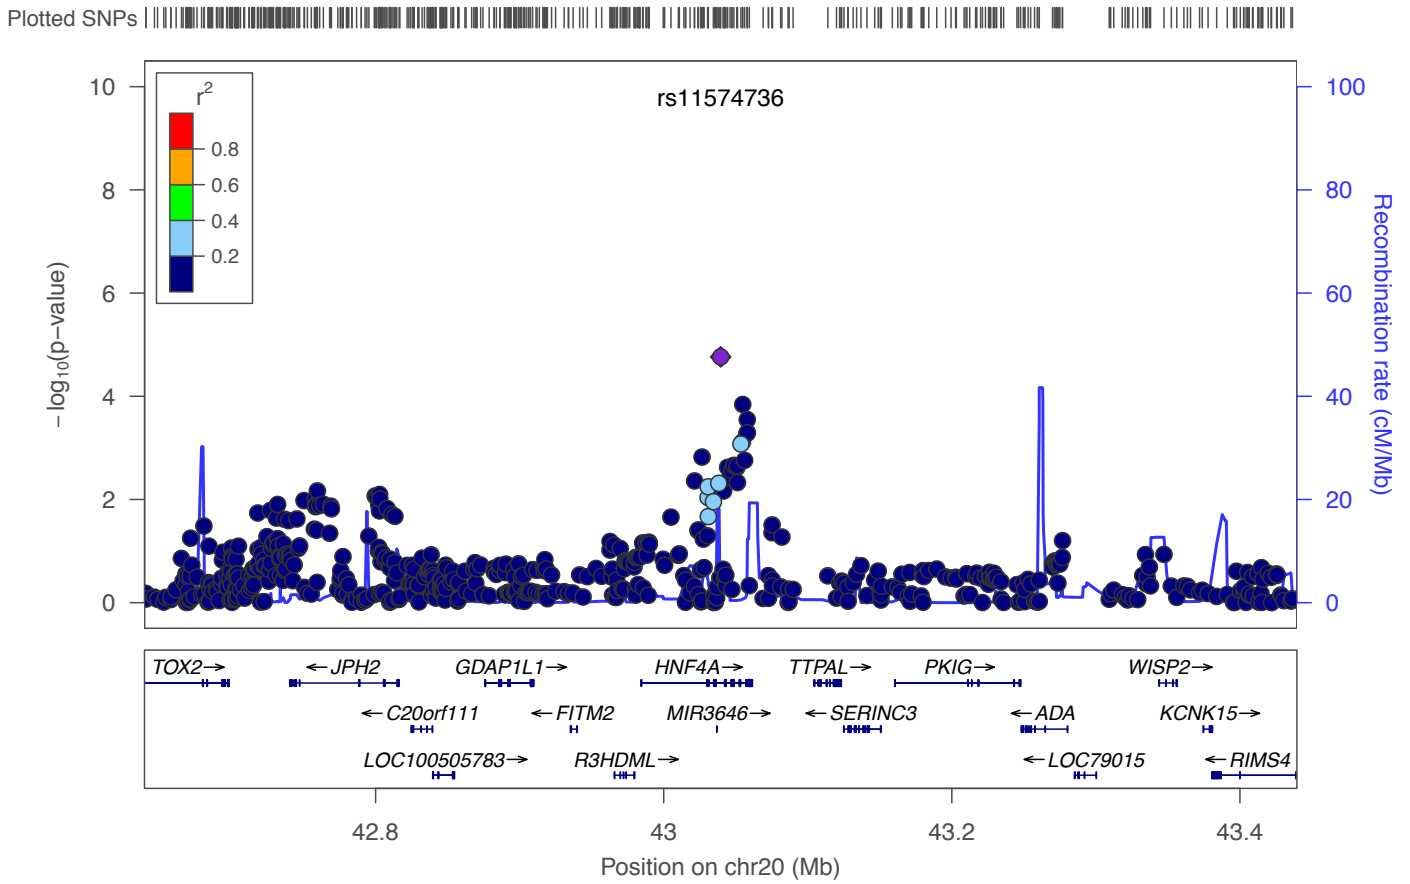

**Figure S3. Locus zoom plot of *HNF4A* association with serum urate.**

Locus zoom plot showing association between GWAS variants located at *HNF4A* and serum urate levels in European. Data from Köttgen et al. (PMID: 23263486).
